# Supplementary material for: Gas Chromatography Multiresidue Method for Enantiomeric Fraction Determination of Psychoactive Substances in Effluents and River Surface Waters
Source: MDPI journal article supplement (doi:10.3390/chemosensors9080224), 2021-08-13
Supplement: s1 [file s1]

# Gas Chromatography Multiresidue Method for Enantiomeric Fraction Determination of Psychoactive Substances in Effluents and River Surface Waters

Ivan Langa <sup>1,2</sup>, Maria Elizabeth Tiritan <sup>1,2,3,4,\*</sup>, Diana Silva <sup>1,2,5</sup> and Cláudia Ribeiro <sup>1,2,3,\*</sup>

<sup>1</sup> CESPU, Instituto de Investigação e Formação Avançada em Ciências e Tecnologias da Saúde, Rua Central de Gandra, 1317, 4585-116 Gandra PRD, Portugal; langacry@gmail.com (I.L.); diana.silva@iucs.cespu.pt (D.S.)

<sup>2</sup> TOXRUN–Toxicology Research Unit, University Institute of Health Sciences, CESPU, CRL, 4585-116 Gandra, Portugal

<sup>3</sup> Centro Interdisciplinar de Investigação Marinha e Ambiental (CIIMAR/CIMAR), Universidade do Porto, Edifício do Terminal de Cruzeiros do Porto de Leixões, Av. General Norton de Matos s/n, 4050-208 Matosinhos, Portugal

<sup>4</sup> Laboratório de Química Orgânica e Farmacêutica, Departamento de Ciências Químicas, Faculdade de Farmácia, Universidade do Porto, Rua de Jorge Viterbo Ferreira, 228, 4050-313 Porto, Portugal

<sup>5</sup> UCIBIO, REQUIMTE, Laboratory of Toxicology, Faculty of Pharmacy, University of Porto, R. Jorge Viterbo Ferreira, n° 228, 4050-313 Porto, Portugal

\* Correspondence: elizabeth.tiritan@iucs.cespu.pt (M.E.T.); claudia.ribeiro@iucs.cespu.pt (C.R.)

## 1. MATERIALS AND METHODS

**Table S1.** Chemical structures, pKa and Log K<sub>ow</sub> of the selected PAS.

| PAS      | Chemical structure                                                                   | pKa  | Log K <sub>ow</sub> |
|----------|--------------------------------------------------------------------------------------|------|---------------------|
| AMP      | 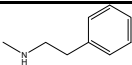 | 9.9  | 1.76                |
| MAMP     |  | 9.87 | 2.07                |
| BPD      |  | 7.14 | 1.32                |
| 3-MMC    |  | -    | 1.76                |
| 3,4-DMMC |  | -    | 2.25                |
| 1-BP     |  | 9.59 | 1.35                |
| MDMA     |  | 9.9  | 2.15                |
| NK       |  | 6.78 | 1.94                |
| BTL      |  | 7.7  | 1.54                |
| 1,4-MPP  |  | 8.98 | 1.29                |

PAS: Psychoactive substances; AMP: amphetamine; MAMP: methamphetamine; BPD: buphedrone; 3-MMC: 3-methylmethcathinone; 3,4-DMMC: 3,4 dimethylmethcathinone; 1-BP: 1-benzylpiperazine; MDMA: 3,4-methylenedioxy-N-methylamphetamine; NK: norketamine; BTL: butylone; 1,4-MPP: 1-(4-methoxyphenyl)-piperazine;

## 2. METHOD PARAMETERS AND VALIDATION

**Table S2.** Range of concentrations (ng L<sup>-1</sup>) of the method calibration curve.

| PAS      | Calibration curve concentration<br>(ng L <sup>-1</sup> ) |     |     |     |     |     |
|----------|----------------------------------------------------------|-----|-----|-----|-----|-----|
| AMP      | 50                                                       | 100 | 125 | 150 | 250 | 300 |
| MAMP     | 50                                                       | 100 | 125 | 150 | 300 |     |
| BPD      | 125                                                      | 175 | 200 | 225 | 375 | 425 |
| 3-MMC    | 250                                                      | 375 | 425 | 500 | 575 |     |
| 3,4-DMMC | 250                                                      | 300 | 375 | 500 | 625 |     |
| 1-BP     | 250                                                      | 300 | 325 | 500 | 625 |     |
| MDMA     | 75                                                       | 125 | 175 | 225 | 300 | 375 |
| NK       | 75                                                       | 100 | 125 | 150 | 200 | 250 |
| BTL      | 75                                                       | 125 | 175 | 250 | 300 | 375 |
| 1,4-MPP  | 75                                                       | 100 | 150 | 175 | 250 |     |

PAS: Psychoactive substances; AMP: amphetamine; MAMP: methamphetamine; BPD: buphedrone; 3-MMC: 3-methylmethcathinone; 3,4-DMMC: 3,4 dimethylmethcathinone; 1-BP: 1-benzylpiperazine; MDMA: 3,4-methylenedioxy-N-methylamphetamine; NK: norketamine; BTL: butylone; 1,4-MPP: 1-(4-metoxyphenyl)-piperazine;

**Table S3.** Quality control (QC) concentrations (ng L<sup>-1</sup>) used for determination of accuracy, intra and inter-precision and recovery of the method.

| PAS | QC concentration (ng L <sup>-1</sup> ) |       |       |          |      |     |     |         |      |     |
|-----|----------------------------------------|-------|-------|----------|------|-----|-----|---------|------|-----|
| AMP | MAMP                                   | BPD   | 3-MMC | 3,4-DMMC | MDMA | NK  | BTL | 1,4-MPP | 1-BP |     |
| QC1 | 100                                    | 75    | 150   | 300      | 300  | 125 | 100 | 100     | 87.5 | 300 |
| QC2 | 137.5                                  | 112.5 | 212.5 | 350      | 350  | 175 | 175 | 175     | 125  | 350 |
| QC3 | 225                                    | 175   | 300   | 500      | 575  | 325 | 300 | 300     | 200  | 575 |

PAS: Psychoactive substances; AMP: amphetamine; MAMP: methamphetamine; BPD: buphedrone; 3-MMC: 3-methylmethcathinone; 3,4-DMMC: 3,4 dimethylmethcathinone; 1-BP: 1-benzylpiperazine; MDMA: 3,4-methylenedioxy-N-methylamphetamine; NK: norketamine; BTL: butylone; 1,4-MPP: 1-(4-metoxyphenyl)-piperazine;

## 3. RESULTS AND DISCUSSION

### 3.1. Derivatization method for diastereomers and derivatives formation

**Table S4.** Products of the reaction of the enantiopure derivatization reagent (R)-MTPA-Cl with AMP and AMP-type substances, SCAT, NK and PP.

|                       |                                                                                        |                                                                                        |
|-----------------------|----------------------------------------------------------------------------------------|----------------------------------------------------------------------------------------|
| AMP                   | 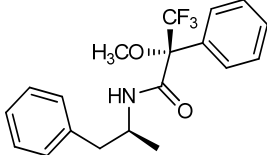   |   |
| AMPs<br>diastereomers | (R)-3,3,3-trifluoro-2-methoxy-2-phenyl-N-((R)-1-phenylpropan-2-yl)propanamide          | ((R)-1-phenylpropan-2-yl)propanamide                                                   |
| MAMP                  |    |   |
|                       | (R)-3,3,3-trifluoro-2-methoxy-N-methyl-2-phenyl-N-((S)-1-phenylpropan-2-yl)propanamide | (R)-3,3,3-trifluoro-2-methoxy-N-methyl-2-phenyl-N-((R)-1-phenylpropan-2-yl)propanamide |

|                           |                  |                                                                                                                                                              |                                                                                                                                                              |
|---------------------------|------------------|--------------------------------------------------------------------------------------------------------------------------------------------------------------|--------------------------------------------------------------------------------------------------------------------------------------------------------------|
| MDMA                      |                  | 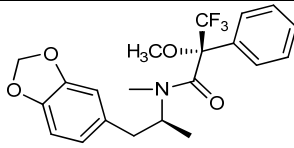                                                                           |                                                                           |
|                           |                  | ( <i>R</i> )- <i>N</i> -(( <i>S</i> )-1-(benzo[ <i>d</i> ][1,3]dioxol-5-yl)propan-2-yl)-3,3,3-trifluoro-2-methoxy- <i>N</i> -methyl-2-phenylpropanamide      | ( <i>R</i> )- <i>N</i> -(( <i>R</i> )-1-(benzo[ <i>d</i> ][1,3]dioxol-5-yl)propan-2-yl)-3,3,3-trifluoro-2-methoxy- <i>N</i> -methyl-2-phenylpropanamide      |
| Norketamine diastereomers | NK               |                                                                            |                                                                           |
|                           |                  | ( <i>R</i> )- <i>N</i> -(( <i>S</i> )-1-(2-chlorophenyl)-2-oxocyclohexyl)-3,3,3-trifluoro-2-methoxy-2-phenylpropanamide                                      | ( <i>R</i> )- <i>N</i> -(( <i>R</i> )-1-(2-chlorophenyl)-2-oxocyclohexyl)-3,3,3-trifluoro-2-methoxy-2-phenylpropanamide                                      |
| BPD                       |                  |                                                                            |                                                                           |
|                           |                  | ( <i>R</i> )-3,3,3-trifluoro-2-methoxy- <i>N</i> -methyl- <i>N</i> -(( <i>S</i> )-1-oxo-1-phenylbutan-2-yl)-2-phenylpropanamide                              | ( <i>R</i> )-3,3,3-trifluoro-2-methoxy- <i>N</i> -methyl- <i>N</i> -(( <i>R</i> )-1-oxo-1-phenylbutan-2-yl)-2-phenylpropanamide                              |
| Cathinones diastereomers  | 3-MMC            |                                                                           |                                                                          |
|                           |                  | ( <i>R</i> )-3,3,3-trifluoro-2-methoxy- <i>N</i> -methyl- <i>N</i> -(( <i>S</i> )-1-oxo-1-( <i>m</i> -tolyl)propan-2-yl)-2-phenylpropanamide                 | ( <i>R</i> )-3,3,3-trifluoro-2-methoxy- <i>N</i> -methyl- <i>N</i> -(( <i>R</i> )-1-oxo-1-( <i>m</i> -tolyl)propan-2-yl)-2-phenylpropanamide                 |
|                           | 3,4-DMMC         |                                                                          |                                                                         |
|                           |                  | ( <i>R</i> )- <i>N</i> -(( <i>S</i> )-1-(3,4-dimethylphenyl)-1-oxopropan-2-yl)-3,3,3-trifluoro-2-methoxy- <i>N</i> -methyl-2-phenylpropanamide               | ( <i>R</i> )- <i>N</i> -(( <i>R</i> )-1-(3,4-dimethylphenyl)-1-oxopropan-2-yl)-3,3,3-trifluoro-2-methoxy- <i>N</i> -methyl-2-phenylpropanamide               |
| BTL                       |                  |                                                                          |                                                                         |
|                           |                  | ( <i>R</i> )- <i>N</i> -(( <i>S</i> )-1-(benzo[ <i>d</i> ][1,3]dioxol-5-yl)-1-oxobutan-2-yl)-3,3,3-trifluoro-2-methoxy- <i>N</i> -methyl-2-phenylpropanamide | ( <i>R</i> )- <i>N</i> -(( <i>R</i> )-1-(benzo[ <i>d</i> ][1,3]dioxol-5-yl)-1-oxobutan-2-yl)-3,3,3-trifluoro-2-methoxy- <i>N</i> -methyl-2-phenylpropanamide |
| Piperazine Derivatives    | 1-BP/<br>1,4-MPP |                                                                          |                                                                         |
|                           |                  | ( <i>R</i> )-1-(4-benzylpiperazin-1-yl)-3,3,3-trifluoro-2-methoxy-2-phenylpropan-1-one                                                                       | ( <i>R</i> )-3,3,3-trifluoro-2-methoxy-1-(4-(4-methoxybenzyl)piperazin-1-yl)-2-phenylpropan-1-one                                                            |

AMP: amphetamine; MAMP: methamphetamine; BPD: buphedrone; 3-MMC: 3-methylmethcathinone; 3,4-DMMC: 3,4 dimethylmethcathinone; 1-BP: 1-benzylpiperazine; MDMA: 3,4-methylenedioxy-*N*-methylamphetamine; NK: norketamine; BTL: butylone; 1,4-MPP: 1-(4-methoxyphenyl)-piperazine;

### 3.2. Application of the method

**Table S5.** Water temperature and physico-chemical parameters (pH, EC and TDS) of Douro estuarine water samples.

| Sampling point | T (°C) | pH   | EC ( $\mu\text{S cm}^{-1}$ ) | TDS ( $\text{mg L}^{-1}$ ) |
|----------------|--------|------|------------------------------|----------------------------|
| S1             | 19     | 8.05 | 17.02                        | 9.05                       |
| S2             | 21     | 8.30 | 16.90                        | 8.89                       |
| S3             | 25     | 8.08 | 17.4                         | 8.93                       |
| S4             | 24     | 8.32 | 16.86                        | 8.90                       |
| S5             | 25     | 7.94 | 17.25                        | 9.39                       |

T: temperature; pH: potential of hydrogen; EC: electrical conductivity; TDS: total dissolved solids;

**Table S6.** Concentration and enantiomeric fraction (EF) for target PAS in effluent and Douro River estuarine water samples.

| PAS         | WWTPA                        |             | WWTPB                        |      | Estuarine water samples      |      |
|-------------|------------------------------|-------------|------------------------------|------|------------------------------|------|
|             | Conc. ( $\text{ng L}^{-1}$ ) | EF          | Conc. ( $\text{ng L}^{-1}$ ) | EF   | Conc. ( $\text{ng L}^{-1}$ ) | EF   |
| AMP (R)     | <LOQ                         | n.d.        | <LOD                         | n.d. | < LOQ ( <b>S1</b> )          | n.d. |
| AMP (S)     | <LOD                         |             | <LOD                         |      | < LOQ ( <b>S1</b> )          |      |
| MAMP (S)    | 57.30                        | $\approx 1$ | <LOQ                         | n.d. | < LOQ ( <b>S1, S4</b> )      | n.d. |
| MAMP (R)    | <LOD                         |             | <LOD                         |      | < LOD                        |      |
| BPD D1      | <LOQ                         | n.d.        | <LOD                         | n.d. | < LOQ ( <b>S3, S4</b> )      | n.d. |
| BPD D2      | <LOD                         |             | <LOD                         |      | < LOD                        |      |
| 3-MMC D1    | <LOD                         | n.d.        | <LOD                         | n.d. | < LOD                        | n.d. |
| 3-MMC D2    | <LOD                         |             | <LOD                         |      | < LOD                        |      |
| 3,4-DMMC D1 | <LOQ                         | n.d.        | <LOD                         | n.d. | < LOD                        | n.d. |
| 3,4-DMMC D2 | <LOD                         |             | <LOD                         |      | < LOD                        |      |
| MDMA (R)    | <LOQ                         | n.d.        | <LOD                         | n.d. | < LOQ ( <b>S5</b> )          | n.d. |
| MDMA (S)    | <LOQ                         |             | <LOD                         |      | < LOD                        |      |
| NK D1       | <LOD                         | n.d.        | <LOD                         | n.d. | < LOD                        | n.d. |
| NK D2       | <LOD                         |             | <LOD                         |      | < LOD                        |      |
| BTL D1      | <LOD                         | n.d.        | <LOD                         | n.d. | < LOD                        | n.d. |
| BTL D2      | <LOD                         |             | <LOD                         |      | < LOD                        |      |
| BP          | <LOD                         | -           | <LOD                         | -    | < LOD                        | -    |
| 1-MPP       | <LOD                         | -           | <LOD                         | -    | < LOD                        | -    |
